1 **A Metabolic Biomarker Panel for Congenital Heart Disease Assessment**  
2 **with Newborn Dried Blood Spots**

3 Scott R. Ceresnac<sup>1\*</sup>, Yaqi Zhang<sup>2,3\*</sup>, Kuo Jung Su<sup>4</sup>, Qiming Tang<sup>4</sup>, Bo Jin<sup>4</sup>,  
4 James Schilling<sup>4</sup>, C. James Chou<sup>3</sup>, Zhi Han<sup>3</sup>, Brendan J. Floyd<sup>5</sup>, John C.  
5 Whitin<sup>5</sup>, Karl G Sylvester<sup>3</sup>, Henry Chubb<sup>1</sup>, Ruben Y. Luo<sup>6</sup>, Lu Tian<sup>7</sup>, Harvey J.  
6 Cohen<sup>5</sup>, Doff B. McElhinney<sup>1</sup>, Xuefeng B. Ling<sup>3\*</sup>

7

8 <sup>1</sup>Department of Cardiothoracic Surgery, Stanford University, Stanford, CA,  
9 United States

10 <sup>2</sup>School of Electrical Power Engineering, South China University of  
11 Technology, Guangzhou, China

12 <sup>3</sup>Department of Surgery, Stanford University, Stanford, CA, United States

13 <sup>4</sup>mProbe Inc, Palo Alto, CA, United States

14 <sup>5</sup>Department of Pediatrics, Stanford University, Stanford, CA, United States

15 <sup>6</sup>Department of Pathology, Stanford University, Stanford, CA, United States

16 <sup>7</sup>Department of Data Science, Stanford University, Stanford, CA, United States

17

18

19 \*Corresponding Author:

20 [ceresnak@stanford.edu](mailto:ceresnak@stanford.edu), [yaqizhang@gpnu.edu.cn](mailto:yaqizhang@gpnu.edu.cn), [bxling@stanford.edu](mailto:bxling@stanford.edu)

21 **Abstract**

22 **Background:** Congenital heart disease (CHD) represents a significant  
23 contributor to both morbidity and mortality in neonates and children. The  
24 prompt recognition of CHD can facilitate timely and appropriate intervention,  
25 reducing the probability of complications and enhancing the prognosis for  
26 impacted newborns. However, unlike other rare conditions routinely identified  
27 through federal and state newborn screening (NBS) programs, there's  
28 currently no analogous dried blood spot (DBS) screening for CHD immediately  
29 after birth.

30 **Objective:** This study was set to identify reliable metabolite biomarkers with  
31 clinical relevance, with the aim to assess feasibility of screening and subtype  
32 classification of CHD utilizing the DBS newborn screening method.

33 **Methods:** We assembled a cohort of DBS datasets from the California  
34 Department of Public Health (CDPH) Biobank, encompassing both normal  
35 controls and three pre-defined CHD categories (tetralogy of Fallot, inherited  
36 arrhythmia syndrome, neonatal cardiomyopathy). A robust, DBS-oriented  
37 metabolomic method, employing both global and targeted strategies based on  
38 liquid chromatography with tandem mass spectrometry (LC-MS/MS), was  
39 developed. To verify the reliability of this metabolic profiling, we conducted a  
40 correlation analysis comparing the absolute quantitated metabolite  
41 concentration in DBS against the CDPH NBS records. Additionally, for  
42 hydrophilic and hydrophobic metabolites, we executed significant pathway and  
43 metabolite analyses respectively. Finally, logistic and LightGBM models were  
44 established to aid in CHD discrimination and classification.

45 **Results:** Our metabolomic workflow demonstrated consistent and reliable  
46 quantification of metabolites in DBS samples stored at the California  
47 Department of Public Health (CDPH) for up to 15 years. Through this process,  
48 we discerned dysregulated metabolic pathways in CHD patients, including  
49 deviations in lipid and energy metabolism, as well as oxidative stress pathways.  
50 Furthermore, we identified three metabolites as potential biomarkers for CHD  
51 assessment, and an additional twelve metabolites as potential markers for  
52 classifying different CHD subtypes within DBS samples.

53 **Conclusions:** This study represents the first attempt to validate metabolite  
54 profiling results using long-term storage DBS samples procured from the  
55 high-quality conditions of the CDPH biobank. The results unveil distinct  
56 metabolic discrepancies between various CHD subtypes and healthy controls.  
57 Furthermore, our findings highlight the potential clinical applications of our  
58 DBS-based methods for CHD screening and subtype classification.

59

## 60 Introduction

61 Congenital heart disease (CHD) ranks as the most prevalent form of  
62 congenital anomalies<sup>1,2</sup>, making it a significant contributor to morbidity and  
63 mortality<sup>3,4</sup>, among neonates and children. With its birth prevalence on an  
64 upward trend, CHD has evolved into a major global health concern.

65 The importance of early diagnosis is paramount for the effective CHD  
66 intervention and treatment. Prenatal diagnosis and early detection  
67 advancements have contributed to a gradual decline in the mortality rate  
68 associated with CHD in children<sup>5</sup>. Various screening approaches for the  
69 detection of cyanotic congenital heart disease have been implemented and  
70 examined, including neonatal pulse oximetry screening<sup>6</sup> and universal ECG  
71 screening<sup>7,8</sup>. However, these methodologies exhibit less than 75% sensitivity  
72 in detecting critical CHD, presenting limitations in the detection of an array of  
73 congenital malformations, cardiomyopathic disorders, and inherited arrhythmia  
74 syndromes. These conditions contribute significantly to neonatal mortality and  
75 sudden death in children and adolescents<sup>9</sup>. Currently, there is no  
76 comprehensive, cost-effective screening method available at birth that can  
77 reliably and consistently detect the diverse range of CHD conditions that could  
78 potentially harm infants and children later in life.

79 Over the past decade, the application of cardiac-specific biomarkers,  
80 proteomic and metabolite analysis, mRNA, and small molecule screens has  
81 seen a significant increase<sup>10-12</sup>. The discovery of biomarkers associated with  
82 cardiac dysfunction, myocardial cell damage, and heart-specific tissue  
83 damage heralds a shift in our approach to screening, assessing, and treating

84 cardiac diseases. It has been shown that structural abnormalities, such as the  
85 metabolism of acylcarnitines<sup>13</sup>, can create detectable metabolomic  
86 disturbances. Physiological alterations linked to cyanosis in cyanotic  
87 congenital heart disease, hemodynamic changes tied to volume and pressure  
88 loading in non-cyanotic lesions, tissue injury due to perfusion abnormalities in  
89 cardiomyopathic states, and cellular changes related to potassium, calcium,  
90 and sodium exchange defects in channelopathies, could all lead to  
91 distinguishable differences in the metabolomic profiles of neonates and  
92 children with cardiac disease<sup>14-18</sup>.

93 Routine neonatal screening serves as a tool to identify diseases that could  
94 potentially impact a child's long-term health or survival. Each year, millions of  
95 infants in the United States undergo newborn screening (NBS), where  
96 substances in dried blood spots (DBS) are measured to check for certain  
97 genetic, endocrine, and metabolic disorders<sup>19</sup>. Early detection, diagnosis, and  
98 intervention can avert death or disability, enabling children to reach their full  
99 potential. Despite this, no DBS newborn screening exists for CHD at birth.

100 Our core hypothesis proposes that deep phenotyping of DBS metabolites at  
101 birth through liquid chromatography-mass spectrometry (LC-MS) could model  
102 and assess cardiac and other organ anomalies with high precision. This  
103 hypothesis was previously tested with our DBS analyses assessing other  
104 neonatal diseases<sup>20</sup>.

105 In this study, we developed an LC-MS based metabolic screening method to  
106 construct a baseline for neonate DBS metabolites and identify a DBS  
107 biomarker panel as a molecular surrogate to assess congenital cardiac

108 abnormalities. Our findings attest to the robustness of our DBS-based LC-MS  
109 workflow, supporting the idea that assessing DBS metabolomic biomarkers  
110 may present a cost-effective and sturdy approach to evaluating the risk of CHD  
111 at birth. Further understanding the functional significance of these CHD  
112 biomarkers could provide fresh insights into the pathophysiology of CHD.

## 113 **Methods**

### 114 **Ethics statement**

115 This DBS NBS method development study involving human participants was  
116 reviewed and approved by ethics committees at Stanford University.

### 117 **Study design**

118 The workflow for this study, as depicted in Fig. 1, was based on the collected  
119 dried blood spot (DBS) samples. Both global **hydrophilic/hydrophobic** and  
120 targeted liquid chromatography-tandem mass spectrometry (LC-MS/MS)  
121 metabolomic assays were conducted, adhering to the NBS DBS processing  
122 method. To verify the reliability of the metabolic profiling from samples that had  
123 been stored for years, a correlation analysis was carried out comparing the  
124 absolutely-quantified metabolite concentration with the California Department  
125 of Public Health (CDPH) gold standard. We identified significant metabolic  
126 pathways and features related to CHD and its subtypes. Finally, models for  
127 CHD diagnosis and subtyping were established to validate the effectiveness of  
128 the CHD-associated metabolic biomarker panel within the DBS samples.

### 129 **Cohorts**

130 We randomly assembled a retrospective cohort of DBS profiling datasets from  
131 the CDPH Biobank. These DBS samples had been stored for up to 15 years  
132 since the time of newborn testing analysis, consented to be preserved at -20°C  
133 in the CDPH Biobank. In total, we included 20 clinical DBS samples, consisting  
134 of 5 healthy controls (HC) and 15 cases of CHD spanning different categories.  
135 The 15 CHD cases included 4 instances of Tetralogy of Fallot (TOF), 5 cases  
136 of inherited arrhythmia syndromes (IAS), and 6 instances of cardiomyopathies  
137 (CMP).

#### 138 Sample preparation

139 The DBS samples were retrieved from -20°C freezers and thawed on ice. Each  
140 DBS sample was cut into 3mm diameter sections, and two of these sections  
141 were transferred into the same Eppendorf tube.

#### 142 **Global hydrophilic and targeted metabolomics**

143 We followed our previously developed standard operational protocols<sup>21</sup> of  
144 global hydrophilic and targeted metabolomics for the workflow in this study,  
145 including sample preprocessing, mass spectrometry signal acquisition, quality  
146 control, data pre-processing, and metabolite biomarker structural identification.

147 For global hydrophilic metabolomics, a mixture of 250 µL extraction buffer  
148 (pre-chilled to -20 °C) consisting of methanol, acetonitrile and ddH<sub>2</sub>O (5:3:2  
149 v/v) was added to each tube containing DBS punches. Samples were vortexed  
150 and centrifuged at 10,000 g for 10 min at 4°C. Supernatant (180 µL) from each  
151 sample was transferred into a clean Eppendorf tube. 100 µL of each sample

152 extract was transfer into an auto-sampler vial for UHPLC-MS (Ultra-High  
153 Performance Liquid Chromatography) analysis.

154 For targeted metabolomics, a mixture of 200  $\mu$ L methanol / acetonitrile (1:1, v/v)  
155 was added into the tube containing DBS punches. Samples were vortexed  
156 vigorously and centrifuged at 10,000 g for 10 min at 4°C. The supernatant of  
157 each sample was transferred into a new tube and dried under nitrogen stream.  
158 10  $\mu$ L of Internal Standard Solution, 90  $\mu$ L of Extraction Buffer, and 200  $\mu$ L  
159 hexane were added into the reconstituted tube for extraction. The sample was  
160 vortexed vigorously for 1 min and centrifuged at 12,000 g for 5 min. 180  $\mu$ L of  
161 upper layer was transferred into another 1.5-mL centrifugal tube and dried  
162 under nitrogen stream again. The residue was reconstituted with 100  $\mu$ L of  
163 Derivatization Buffer. The reconstituted sample was incubated at 95°C for 15  
164 min. After derivatization, 100  $\mu$ L of each reconstituted sample was transferred  
165 into an auto-sampler vial for the analysis of fatty acids. 80  $\mu$ L of lower layer  
166 was transferred into an auto-sampler vial for the analysis of amino acids and  
167 acylcarnitines.

#### 168 **Global hydrophobic metabolomics**

169 For global hydrophobic metabolomics, a mixture of 400  $\mu$ L of chloroform /  
170 methanol (1:1, v/v) and 200  $\mu$ L of water with lithium chloride were added to  
171 each tube containing DBS punches. Afterwards, the sample was vortexed  
172 rigorously for 30 sec and centrifuged at 12,000 g for 5 min. The bottom layer of  
173 each sample was transfered into another tube. The top layer was re-extracted  
174 with 400  $\mu$ L of chloroform and vortexed for 30 sec and centrifuged at 12,000 g  
175 for 5 min. The bottom layer was removed and combined with extract from



176 previous trial. The combined extract was dried under nitrogen and  
177 reconstituted with 100  $\mu$ L of methanol: chloroform (1:1, v/v). Thereafter, the  
178 DBS extract was transferred into auto-sampler vial with micro-insert for LC/MS  
179 analysis.

180 For global hydrophobic metabolomics, 5  $\mu$ L of DBS extract was injected via a  
181 Vanquish UHPLC system. The mobile phase was methanol with 10 mM  
182 ammonium acetate at a flow rate of 0.1 mL/min for a total run time of 3 minutes.  
183 The conditions of ionization source were set at 3.4 kV for spray voltage, 15 for  
184 sheath gas, 5 for aux gas, 325°C for capillary temperature, 55 for S-lens, and  
185 250°C for vaporizer temperature. The MS spectra were acquired with 2 scans  
186 using an AGC target of 1e6 and a resolution of 120,000 (FWHM at 200 m/z)  
187 from 200 to 1200 m/z. The column oven was maintained at 25°C throughout  
188 the analysis.

189 Metabolic pathway enrichment analysis with global hydrophilic and  
190 hydrophobic metabolomics

191 To carry out pathway enrichment analysis on both hydrophilic and hydrophobic  
192 mass spectrometric profiling results, a univariate analysis was utilized to  
193 compute the fold change and p-value (using Student's t-test) for each  
194 component across the three different CHD subtypes. Following the correction  
195 for false discovery, components that showed significant changes (adjusted  
196 p-value < 0.05) were chosen for subsequent analysis.

197 All significantly altered hydrophilic metabolites were categorized into KEGG  
198 pathways<sup>22</sup> for further examination, while significantly changed hydrophobic

199 metabolites were grouped into the Lipid Map database<sup>23</sup>. Enriched pathways  
200 of significance were identified with a Fisher's exact test p-value of < 0.05.

201 **Statistic learning for multi-class classification**

202 Orthogonal partial least squares discriminant analysis (OPLS-DA) was  
203 performed using global hydrophilic and hydrophobic metabolic profiling results.  
204 Unsupervised clustering results were used to visualize the two-dimensional  
205 clustering patterns of HC, TOF, IAS and CMP DBS samples. With OPLS-DA  
206 results, the performance of the discrimination between two of these DBS  
207 sample categories was assessed using a receiver operating characteristic  
208 curve (ROC) and the area under the curve (AUC).

209 To distinguish between CHD patients and healthy controls, a logistic model<sup>24</sup>  
210 was constructed based on targeted metabolomic profiling results. For CHD  
211 subtyping, the importance of identified targeted metabolites was determined  
212 using a gradient boosting machine provided by the LightGBM library<sup>25</sup>.  
213 Analysis was implemented with default parameters, and the metric used for  
214 early stopping was set to the error rate for multi-class classification<sup>26</sup>.  
215 Metabolites were then ranked based on their normalized importance scores.  
216 Metabolites with cumulative importance greater than 80% were selected as  
217 biomarkers.

218 The significantly relevant biomarker metabolites associated with CHD  
219 diagnosis and subtyping were then proposed and discussed.

220 **Results**

221 Demographics and Clinical Characteristics

222 **Table 1** summarizes the cohort demographics and clinical characteristics. This  
223 includes a cohort of 20 neonates, comprising of 5 controls and 15 CHD  
224 patients. Of these 20 neonates, 11 were boys (55%) and 9 were girls (45%).  
225 The 15 CHD patients comprised 4 diagnosed with CHD-Tetralogy of Fallot  
226 (TOF), 5 with CHD-inherited arrhythmia syndromes (IAS (2 Brugada, 3 Long  
227 QT syndrome)), and 6 with CHD-cardiomyopathies (CMP (3 dilated, 3  
228 hypertrophic cardiomyopathy)). No statistically significant differences were  
229 observed in the distribution of gender and race across all groups.

230 The DBS samples had been stored in the CDPH biobank at -20 °C for up to 15  
231 years, as shown in Fig. 2. We reanalyzed the concentrations of 28 metabolites,  
232 which are common to the CDPH DBS NBS records (Table 1) and include  
233 amino acids, free carnitines, and acylcarnitines. Fig. 3 shows that 24 out of the  
234 28 metabolites exhibit a strong correlation, affirming both the robustness of our  
235 metabolomic profiling workflow and the reliability of these DBS samples even  
236 after many years of storage.

237 Exploration of the unique metabolic patterns among different CHD subtypes

238 Two distinct high-throughput global mass spectrometric workflows were  
239 conducted, focusing on hydrophilic and hydrophobic metabolites separately.  
240 After data preprocessing, a total of 1829 compounds were identified in the  
241 global hydrophilic metabolomic profiling, and 1383 compounds were identified  
242 in the global hydrophobic metabolomics.

243 Multivariate analysis, specifically sparse partial least squares discriminant  
244 analysis (OPLS-DA), was then performed on the global hydrophilic and  
245 hydrophobic metabolomics to investigate different CHD subtypes, including  
246 TOF, IAS, and CMP. The results, presented in **Fig. 4** and **Table 2**, revealed  
247 distinct clustering patterns for samples from various CHD subtypes in both the  
248 global hydrophilic and hydrophobic metabolic profiling.

249 Interestingly (**Fig. 4** and **Table 2**), CHD-IAS could not be reliably distinguished  
250 from other groups (ROC AUC, 0.607; P value, 0.458) based on the global  
251 hydrophilic metabolomics, while CHD-CMP also showed poor distinction from  
252 other groups (ROC AUC, 0.533; P value, 0.827) based on the global  
253 hydrophobic metabolomics. These findings suggest that each CHD subtype  
254 may indeed exhibit unique metabolic differences compared to both the healthy  
255 control and other CHD subtype groups.

#### 256 **Pathway analysis with global hydrophilic and hydrophobic** 257 **metabolomics**

258 To identify specific metabolic differences in CHD subtypes, pathway  
259 enrichment analysis was performed on the significant changes observed in  
260 global metabolism (adjusted P value < 0.05) (Fig. 5). For hydrophilic  
261 metabolites, the KEGG pathway database was utilized, while the Lipids Map  
262 database was used for hydrophobic metabolites. The results depicted in Fig. 5  
263 show that the Arachidonic acid metabolism and Monoradylglycerols pathways  
264 are consistently and significantly enriched in all three CHD subtypes.  
265 Additionally, the Linoleic acid metabolism, serotonergic synapse, and  
266 sphingoid bases pathways are significantly enriched solely in the IAS and TOF

267 subtypes of CHD. Moreover, Quinones and hydroquinones were found to be  
268 significantly enriched only in CHD-CMP, while Arginine and ornithine  
269 metabolism showed significant enrichment exclusively in CHD-IAS. These  
270 findings suggest the presence of diverse metabolic pathway changes among  
271 the different CHD subtypes, emphasizing the importance of considering both  
272 hydrophilic and hydrophobic metabolites when constructing a CHD diagnosis  
273 panel. Such a comprehensive approach will enable a more accurate and  
274 informative characterization of the metabolic profiles associated with different  
275 CHD subtypes.

#### 276 Identification of a metabolic signature for CHD

277 Using our targeted metabolomics methods, we conducted quantitative  
278 measurements of 836 targeted metabolites and lipids in DBS samples  
279 collected from both CHD patients and healthy controls. Upon comparing CHD  
280 patients with healthy controls, we identified 3 biomarker metabolites ( $p < 0.05$ )  
281 through univariate analysis, namely PC(d16:1-22:3), C14:1-Carnitine, and  
282 C12-Carnitine (**Fig. 6A** and **Fig. 6B**).

283 To further explore the diagnostic potential of these biomarkers, we constructed  
284 a logistic model based on their concentrations. This logistic model exhibited  
285 high accuracy in distinguishing between CHD patients and healthy controls,  
286 achieving an area under the curve (AUC) of 0.982 (95% CI: 0.92-1.00) (**Fig.**  
287 **6C**). The sensitivity and specificity of this logistic model were 92.8% and  
288 75.0%, respectively.

289 Regarding the metabolic signature for CHD subtyping, we employed the  
290 LightGBM model to calculate the importance of each metabolite in the  
291 multiclass classification of the three types of CHD. This analysis revealed 12  
292 crucial metabolites required to achieve 80% cumulative importance (**Fig. 6D**).  
293 These significant metabolites include Alanine, C10-Carnitine,  
294 TG(16:0-16:0-20:2), TG(16:1-18:2-18:3), PE(a20:0-20:2), C10:1-Carnitine,  
295 Octacosanoic acid(28:0), C14:1OH-Carnitine, C8:1-Carnitine, Asparagine,  
296 C0-Carnitine, and d18:0 CE.

297 Following that, OPLS-DA analysis was carried out using the aforementioned  
298 12 metabolites (**Fig. 6E**). The results, as shown in **Fig. 7**, revealed an AUC of  
299 0.963 (P value = 0.03) for distinguishing CMP vs Other, an AUC of 0.98 (P  
300 value = 0.03) for distinguishing IAS vs Other, and an AUC of 0.84 (P value =  
301 0.05) for distinguishing TOF vs Other. These findings indicate promising  
302 discriminatory capabilities of the selected metabolites in identifying different  
303 CHD subtypes when compared to the other groups.

## 304 **Discussion**

### 305 **Summary of main findings**

306 To explore the identification of CHD metabolic biomarkers using dried blood  
307 DBS samples, we began by verifying the reliability of the metabolic profiling  
308 from these samples, even after years of storage. This was achieved through  
309 correlation analysis of the absolute quantitated metabolite concentrations from  
310 this study and the CDPH database records. Subsequently, utilizing global and

311 targeted LC-MS/MS metabolomic profiling methods, we further analyzed the  
312 significant metabolic pathways associated with CHD and its subtypes.  
313 In the process, we established models for CHD diagnosis and subtyping to  
314 validate the effectiveness of the CHD-associated metabolic patterns. Our  
315 findings revealed distinct metabolic differences in significant pathways and  
316 unique metabolic patterns related to both CHD and its subtypes. Furthermore,  
317 using targeted metabolomics, we identified 3 biomarker metabolites for CHD  
318 diagnosis and 12 biomarker metabolites for CHD subtyping. These results  
319 support the hypothesis that serial LC-MS profiling of DBS metabolites from  
320 newborns may hold potential in accurately assessing CHD and offer a  
321 non-invasive and cost-effective method for CHD detection.

322 Overall, this study sheds light on the potential of utilizing metabolic profiling  
323 from DBS samples as a precise and efficient means of CHD diagnosis, paving  
324 the way for improved early detection and management of this condition.

### 325 **The stability of amino acid and acyl carnitines in DBS**

326 In this study, we utilized CHD DBS samples obtained from the CDPH Biobank,  
327 an invaluable resource for research due to its extensive collection of biological  
328 specimens suitable for various types of investigations, including  
329 epidemiological, genetic, and biomarker research. However, concerns  
330 regarding the stability and quality of samples stored in biobanks over extended  
331 periods have been raised, limiting retrospective analyses using stored DBS.

332 To address this concern and ensure the accuracy and reliability of  
333 metabolomic studies, we focused on assessing the stability of acylcarnitines  
334 and amino acids in DBS stored in freezers after newborn screening. Our  
335 research aimed to shed light on the long-term stability of these metabolites in  
336 stored specimens.

337 The encouraging findings of our study revealed excellent stability for both  
338 amino acids and acyl carnitines, even after up to 15 years of storage. This  
339 discovery provides reassurance that dried blood specimens stored in the  
340 CDPH biobank freezers can be reliably used for metabolomic studies, even  
341 following prolonged storage. This insight enhances the confidence in utilizing  
342 the biobank's stored samples for future investigations, contributing to the  
343 advancement of CHD and other related research areas.

#### 344 **CHD biomarker biological implications**

345 Informative alterations in plasma metabolite concentrations related to specific  
346 metabolic pathways have been found to be associated with the CHD  
347 pathogenesis and pathophysiology<sup>27</sup>. A notable example is the significant  
348 involvement of fatty acid metabolism in hypertrophied newborn hearts, where it  
349 plays a crucial role in energy generation<sup>28</sup>. In our investigation, we discovered  
350 a significant association between the arachidonic acid (AA) metabolism  
351 pathway and the pathophysiology of various CHD subtypes, including TOF,  
352 IAS, and CMP (**Fig. 5A**). The AA metabolism pathway is intricate, involving the  
353 metabolism of arachidonic acid, an omega-6 fatty acid, by enzymes like  
354 cyclooxygenases (COX), lipoxygenases (LOX), and cytochrome P450 (CYP)  
355 enzymes. This pathway gives rise to diverse bioactive lipid mediators, such as



356 prostaglandins, thromboxanes, leukotrienes, and epoxyeicosatrienoic acids  
357 (EETs), which play essential roles in various physiological and pathological  
358 processes<sup>29</sup>.

359 Previous studies have demonstrated that dysregulation of the AA metabolism  
360 pathway is linked to the development and progression of CHD. For instance, in  
361 TOF, a common CHD type, there is evidence of increased oxidative stress and  
362 inflammation<sup>30,31</sup>, leading to potential dysregulation of the AA metabolism  
363 pathway. Such dysregulation could result in the overproduction of  
364 vasoconstrictive and pro-inflammatory mediators, such as thromboxane A2  
365 and leukotriene B4, contributing to pulmonary hypertension and exacerbating  
366 right ventricular dysfunction<sup>32,33</sup>. Similarly, in inherited arrhythmia syndromes  
367 like long QT syndrome and Brugada syndrome, genetic mutations in ion  
368 channel genes can alter AA metabolism and lead to the production of EETs.  
369 These EETs can modulate ion channel activity, affecting cardiac repolarization  
370 and leading to arrhythmias and sudden cardiac death<sup>34-36</sup>. In cardiomyopathies  
371 such as hypertrophic cardiomyopathy and dilated cardiomyopathy, elevated  
372 inflammation and fibrosis have been observed, potentially contributing to the  
373 dysregulation of the AA metabolism pathway<sup>37,38</sup>. Consequently, the  
374 overproduction of pro-inflammatory and pro-fibrotic mediators, such as  
375 prostaglandin E2 and leukotriene B4, may play a role in cardiac remodeling  
376 and dysfunction. Overall, our findings highlight the relevance of the AA  
377 metabolism pathway in CHD pathogenesis and shed light on its potential as a  
378 target for further research and therapeutic interventions.

379 Pathway enrichment analysis conducted on the global metabolic profiling  
380 revealed a particularly significant change in the linoleic acid (LA) metabolic  
381 pathway in TOF and IAS, while no substantial change was observed in CMP  
382 (**Fig. 5A**). It's worth noting that the LA pathway and AA pathway are closely  
383 interrelated. The metabolism of linoleic acid involves a series of enzymatic  
384 reactions that ultimately lead to the production of arachidonic acid (AA) and its  
385 derivatives, including prostaglandins and leukotrienes, which play pivotal roles  
386 in inflammation, cardiovascular function, and other physiological processes.  
387 Recent studies have indicated that the linoleic acid pathway may play a role in  
388 the development of coronary heart disease [39]. Specifically, research  
389 suggests that mutations in the gene responsible for coding delta-6 desaturase  
390 (D6D), the enzyme responsible for converting linoleic acid to arachidonic acid,  
391 could be associated with an increased risk of coronary heart disease<sup>39</sup>.  
392 Furthermore, LA metabolism may also interact with other molecular pathways  
393 involved in cardiac development, such as the Wnt signaling pathway, which  
394 has been implicated in CHD pathogenesis<sup>40-42</sup>. Although the exact  
395 mechanisms by which dysregulation of the LA metabolism pathway contributes  
396 to CHD are not yet fully understood, the linoleic acid metabolism pathway has  
397 emerged as a potential contributor to the pathogenesis of congenital heart  
398 disease. These findings highlight the importance of further research into this  
399 metabolic pathway and its potential implications in CHD development and  
400 progression.

401 Monoradylglycerols (MG) are a type of lipid molecule characterized by a  
402 glycerol backbone with a single fatty acid molecule attached to it. These lipids  
403 are commonly found in various foods, particularly in processed foods that

404 contain added fats and oils. Currently, there is no direct evidence to suggest  
405 that MG are directly linked to the development of CHD. However, studies have  
406 demonstrated that a diet high in saturated fats, often found in processed foods  
407 containing MG, may indeed increase the risk of developing CHD. High-fat diets  
408 in expectant mothers have been shown to enhance the expression of placental  
409 mRNA associated with the arachidonic acid (AA) metabolism pathway<sup>43</sup>. This  
410 can lead to elevated fetal arachidonic acid levels due to maternal arachidonic  
411 acid transfer, resulting in an upregulation of fetal VEGF expression<sup>44</sup>.  
412 Consequently, an overexpression of VEGF in the myocardium may impede the  
413 process of epithelial-mesenchymal transformation, which is crucial for  
414 endocardial cushion formation. Such impairment of endocardial cushion  
415 formation can trigger defects in septation and outflow tract development<sup>45</sup>. In  
416 this context, Smedts et al. reported that a high maternal intake of saturated fat  
417 is associated with a higher likelihood of developing outflow tract defects<sup>46</sup>.  
418 Furthermore, these researchers found that infants born to mothers with  
419 abnormal lipid profiles have twice the risk of CHD<sup>47</sup>. While MG themselves  
420 may not be directly linked to CHD, their presence in processed foods that are  
421 high in saturated fats may contribute to an increased risk of developing CHD  
422 over time. In conclusion, while MG are not directly implicated in CHD  
423 development, their association with processed foods high in saturated fats  
424 underscores the importance of dietary considerations in reducing the risk of  
425 CHD. Adopting a balanced and healthy diet may help mitigate potential risks  
426 associated with the consumption of saturated fats and processed foods.

427 The QHJ pathway is a vital metabolic pathway responsible for maintaining  
428 cellular homeostasis and safeguarding cells against oxidative stress. Its

429 primary function involves regulating the redox balance in cells by converting  
430 quinones to hydroquinones, which helps control oxidative stress. Oxidative  
431 stress arises when there is an imbalance between reactive oxygen species  
432 (ROS) production and the cellular antioxidant defense system. Excessive ROS  
433 production can lead to oxidative damage of cellular components, such as DNA,  
434 proteins, and lipids, ultimately resulting in cellular dysfunction and cell death.  
435 This oxidative stress condition has been implicated in the pathogenesis of  
436 various diseases, including CHD. Prior studies have highlighted the  
437 involvement of oxidative stress in the development of heart malformations,  
438 impaired cardiac function, and other complications associated with CHD<sup>48</sup>.  
439 Both cyanotic and acyanotic congenital heart diseases have been shown to  
440 induce a pro-oxidant state in the human body, leading to increased levels of  
441 total antioxidants, oxidants, and the oxidative stress index in affected  
442 children<sup>49,50</sup>. In our study, we observed that the QHQ pathway showed  
443 significant differences only in CMP patients (**Fig. 5B**). However, further  
444 research is warranted to fully comprehend the underlying mechanisms by  
445 which oxidative stress contributes to CHD development. Additionally,  
446 identifying potential markers for the early diagnosis of this condition could be  
447 crucial in advancing CHD management and treatment strategies. In summary,  
448 the QHQ pathway's involvement in cellular redox regulation and oxidative  
449 stress highlights its potential significance in CHD pathogenesis. Understanding  
450 its role could provide valuable insights into the development and progression  
451 of CHD and pave the way for novel therapeutic interventions and diagnostic  
452 approaches.

453 Furthermore, our study involved targeted metabolomics to profile amino acids,  
454 acylcarnitines, and lipids, given their central role in the pathogenesis of heart  
455 disease. Carnitine and acylcarnitines play critical roles in energy metabolism,  
456 especially in the transport of long-chain fatty acids into the mitochondria for  
457 energy production. Infants with CHD are particularly susceptible to energy  
458 imbalances, and although most of them have normal weight at birth, they often  
459 experience nutritional and growth problems in early infancy<sup>51</sup>. This has spurred  
460 growing interest in investigating the potential of carnitine and acylcarnitine for  
461 the diagnosis and management of CHD. Several studies have reported  
462 decreased levels of carnitine and acylcarnitines in patients with CHDs,  
463 particularly those with ventricular overload or pulmonary hypertension<sup>52,53</sup>.  
464 These decreases may indicate impaired cardiac metabolism and energy  
465 production, which can contribute to the development of cardiomyopathy and  
466 other complications. Beyond carnitine and acylcarnitines, Bahado-Singh et al.  
467 conducted a study examining phosphatidylcholine (PC) levels in CHD patients.  
468 PC is a major component of cell membranes and is vital for cell structure and  
469 function. In the context of CHD, disturbances in tissue remodeling may impact  
470 the rate of cell membrane synthesis and destruction, leading to abnormal  
471 choline and PC metabolism. Their study revealed significant abnormalities in  
472 phosphatidylcholine (PC) and lipid levels in the serum of pregnant women  
473 carrying CHD fetuses during the first trimester. Additionally, disturbances in  
474 carnitine levels and lipid synthesis were identified, potentially linked to  
475 single-carbon metabolism through choline<sup>54</sup>. Consistent with these studies, our  
476 research unveiled statistically significant alterations in acylcarnitine and PC  
477 levels in DBS samples of CHD patients compared to those of healthy children.

478 Specifically, we identified C12-carnitine, C14:1 carnitine, and PC(d16:1-22:3)  
479 as potential diagnostic markers for CHD. These findings provide valuable  
480 insights into the metabolic changes associated with CHD and may offer  
481 promising avenues for improved diagnosis and management of this condition.

#### 482 Limitations

483 While our study shows promising potential for metabolomics in CHD newborn  
484 screening, it is essential to acknowledge several limitations that may influence  
485 the interpretation of our findings. One of the primary limitations is the small  
486 sample size used in our study, which may limit the representativeness of our  
487 results to a broader population. To enhance the reliability and generalizability  
488 of our findings, future research should strive to include larger cohorts, allowing  
489 for more robust statistical analysis and validation of the identified biomarkers.  
490 Furthermore, it is worth noting that our study was conducted at a specific  
491 location, California, USA, which could introduce potential biases related to  
492 sample collection, processing, and data analysis. To overcome this limitation  
493 and increase the external validity of our findings, conducting multicenter  
494 studies in different regions with diverse populations would be highly beneficial.  
495 Another important limitation of our study is the lack of consideration for  
496 potential confounding factors that may influence the identified biomarkers.  
497 Factors such as prenatal exposures, maternal health, and perinatal variables  
498 could have an impact on the metabolic signature of CHD. Future research  
499 should take these confounders into account to gain a more comprehensive  
500 understanding of their influence on metabolomic profiles in CHD. In conclusion,  
501 while our study provides valuable insights into the potential of metabolomics in

502 CHD screening, it is crucial to recognize and address these limitations in future  
503 investigations. By doing so, we can further enhance the reliability and  
504 applicability of metabolomics in early CHD detection and potentially improve  
505 patient outcomes.

## 506 **Conclusion**

507 Newborn screening using tandem mass spectrometry has been widely  
508 adopted as a public health strategy in developed countries to detect inborn  
509 errors of metabolism. However, its sensitivity for detecting critical congenital  
510 heart disease (CHD) remains relatively low, necessitating the urgent  
511 exploration of CHD-related biomarkers. In our study, we have made significant  
512 progress in this area. Our research has demonstrated the excellent stability of  
513 amino acids and acyl carnitines in dried blood spots (DBS) even after  
514 extended storage of up to 15 years. Leveraging this stability, we identified  
515 dysregulated metabolic pathways in CHD patients, including alterations in lipid  
516 metabolism, energy metabolism, and oxidative stress pathways. Furthermore,  
517 through targeted metabolomics, we successfully uncovered potential  
518 diagnostic biomarkers, such as acylcarnitines and phosphatidylcholine (PC).  
519 These identified biomarker metabolites associated with CHD diagnosis and  
520 subtyping hold promising potential as a metabolic signature for CHD newborn  
521 screening. This exciting finding opens the door to potential clinical applications  
522 of metabolomics in facilitating early CHD detection and assessment, utilizing  
523 dry blood spot samples. Moreover, by further investigating the biomarker  
524 metabolites and their underlying enriched pathways, we may gain deeper  
525 insights into the mechanisms underlying CHD pathophysiology. This can lead

526 to a better understanding of CHD development, which has implications for  
527 future research, treatments, and improved patient outcomes. In conclusion,  
528 our study highlights the significant progress made in the application of  
529 metabolomics for CHD newborn screening and the identification of potential  
530 biomarkers. By unraveling the metabolic changes associated with CHD, we  
531 can move closer to developing effective screening methods and enhancing our  
532 understanding of CHD's pathogenesis.

### 533 **Tables**

534 **Table 1.** The demographics of CDPH DBS Samples.

| Characters                     | Control | CHD     |        |        | P-value |
|--------------------------------|---------|---------|--------|--------|---------|
|                                |         | TOF     | IAS    | CMP    |         |
| <b>Total</b>                   | 5       | 4       | 5      | 6      |         |
| <b>Diagnosis</b>               |         |         |        |        | < 0.001 |
| Normal                         | 5 (100) | 0 (0)   | 0 (0)  | 0 (0)  |         |
| Tetralogy of Fallot            | 0 (0)   | 4 (100) | 0 (0)  | 0 (0)  |         |
| Brugada syndrome               | 0 (0)   | 0 (0)   | 2 (40) | 0 (0)  |         |
| Long QT syndrome               | 0 (0)   | 0 (0)   | 3 (60) | 0 (0)  |         |
| Dilated cardiomyopathy         | 0 (0)   | 0 (0)   | 0 (0)  | 3 (50) |         |
| Hypertrophic<br>cardiomyopathy | 0 (0)   | 0 (0)   | 0 (0)  | 3 (50) |         |



|                                                        |                   |                     |                   |                     |       |
|--------------------------------------------------------|-------------------|---------------------|-------------------|---------------------|-------|
| <b>Age</b>                                             |                   |                     |                   |                     |       |
| mean (SD)                                              | 0 (0)             | 0 (0)               | 0 (0)             | 0 (0)               |       |
| <b>Gender</b>                                          |                   |                     |                   |                     |       |
|                                                        |                   |                     |                   |                     | 0.929 |
| Female                                                 | 2 (40)            | 2 (50)              | 3 (60)            | 2 (33.3)            |       |
| Male                                                   | 3 (60)            | 2 (50)              | 2 (40)            | 4 (66.7)            |       |
| <b>Race</b>                                            |                   |                     |                   |                     |       |
|                                                        |                   |                     |                   |                     | 0.168 |
| Asian                                                  | 0 (0)             | 1 (25)              | 0 (0)             | 1 (16.7)            |       |
| Black                                                  | 1 (20)            | 0 (0)               | 0 (0)             | 0 (0)               |       |
| Hispanic                                               | 0 (0)             | 1 (25)              | 4 (80)            | 3 (50)              |       |
| White                                                  | 4 (80)            | 2 (50)              | 1 (20)            | 2 (33.3)            |       |
| <b>CDPH DBS NBS records</b>                            |                   |                     |                   |                     |       |
| Thyroid stimulating hormone, mean (SD)                 | 6.7 (4.7)         | 5.6 (5.4)           | 5.5 (3.9)         | 4.4 (1.7)           | 0.817 |
| C8-Carnitine, mean (SD)                                | 0.1 (0)           | 0 (0)               | 0.1 (0)           | 0.1 (0)             | 0.011 |
| Galactose-1-phosphate uridyl transferase, median (IQR) | 247.2 (217,267.5) | 219.1 (170.6,274.6) | 269.5 (260.4,271) | 308.5 (304.3,314.1) | 0.166 |
| Valine, mean (SD)                                      | 105.9 (19.3)      | 102.7 (60.9)        | 114.3 (40.7)      | 90 (20.9)           | 0.74  |
| C18:1-Carnitine, mean (SD)                             | 1.2 (0.3)         | 0.9 (0.5)           | 1 (0.3)           | 1.2 (0.3)           | 0.513 |
| C160H-Carnitine                                        | 0 (0)             | 0 (0)               | 0 (0)             | 0 (0)               | 0.164 |

|                                              |                   |                   |                   |                   |       |
|----------------------------------------------|-------------------|-------------------|-------------------|-------------------|-------|
| /C16-Carnitine Ratio, mean (SD)              |                   |                   |                   |                   |       |
| C16:1-Carnitine, mean (SD)                   | 0.3 (0)           | 0.1 (0.1)         | 0.2 (0.1)         | 0.3 (0.1)         | 0.02  |
| 17-Hydroxyprogesterone (17-OHP), mean (SD)   | 13.3 (8.9)        | 18.3 (8.8)        | 22.3 (18.6)       | 10.9 (3.4)        | 0.378 |
| C3-Carnitine / C2-Carnitine Ratio, mean (SD) | 0.1 (0)           | 0.1 (0)           | 0.1 (0)           | 0.1 (0)           | 0.291 |
| C14-Carnitine, mean (SD)                     | 0.3 (0)           | 0.2 (0.1)         | 0.2 (0)           | 0.2 (0.1)         | 0.005 |
| Methionine, mean (SD)                        | 28 (6.1)          | 25.5 (12.4)       | 20.2 (4.7)        | 26 (5.5)          | 0.397 |
| Alanine, mean (SD)                           | 230 (96.8)        | 369.8 (180.5)     | 307.2 (74)        | 307.3 (109)       | 0.379 |
| Immunoreactive trypsinogen, mean (SD)        | 17.7 (7.7)        | 15.9 (2.5)        | 30.8 (16.1)       | 18.6 (8.3)        | 0.131 |
| Ornithine/Citrulline Ratio, median (IQR)     | 5.7 (4.7,7.5)     | 6.5 (5.5,8.8)     | 4.8 (4.8,8.4)     | 4.6 (4.3,4.9)     | 0.385 |
| Arginine/Ornithine Ratio, mean (SD)          | 0.1 (0)           | 0.1 (0.1)         | 0.1 (0.1)         | 0.1 (0.1)         | 0.919 |
| Leucine/Isoleucine, median (IQR)             | 99.1 (93.4,113.2) | 86.7 (61.2,133.5) | 95.4 (62.8,106.5) | 88.9 (85.2,100.7) | 0.838 |
| C12-Carnitine, mean (SD)                     | 0.2 (0.1)         | 0 (0)             | 0.1 (0.1)         | 0.1 (0)           | 0.016 |
| C18:2-Carnitine, median                      | 0.1               | 0.3               | 0.1               | 0.2               | 0.278 |

|                                                      |                  |                  |                  |                  |       |
|------------------------------------------------------|------------------|------------------|------------------|------------------|-------|
| (IQR)                                                | (0.1,0.2)        | (0.2,0.6)        | (0.1,0.3)        | (0.1,0.2)        |       |
| Glycine, mean (SD)                                   | 525.6<br>(89.3)  | 448 (213.7)      | 471.8<br>(105.1) | 553.5<br>(68.6)  | 0.521 |
| C6-Carnitine, mean (SD)                              | 0.1 (0)          | 0 (0)            | 0 (0)            | 0.1 (0)          | 0.097 |
| C5OH-Carnitine, median<br>(IQR)                      | 0.2<br>(0.1,0.2) | 0.2<br>(0.2,0.2) | 0.2<br>(0.2,0.3) | 0.2<br>(0.2,0.2) | 0.579 |
| Succinylacetone, mean (SD)                           | 0.5 (0.3)        | 0.2 (0.1)        | 0.6 (0.4)        | 0.4 (0.3)        | 0.33  |
| C12:1-Carnitine, mean (SD)                           | 0.1 (0.1)        | 0 (0)            | 0.1 (0.1)        | 0.1 (0)          | 0.018 |
| Arginine                                             | 8.6 (2.6)        | 8.8 (7.9)        | 9.2 (3.1)        | 7.5 (6.6)        | 0.96  |
| C18:1OH-Carnitine, mean<br>(SD)                      | 0 (0)            | 0 (0)            | 0 (0)            | 0 (0)            | 0.184 |
| C3DC-Carnitine<br>/C10-Carnitine Ratio, mean<br>(SD) | 1.3 (0.4)        | 2.7 (0.9)        | 1.7 (0.6)        | 2.1 (1.2)        | 0.157 |
| FC, mean (SD)                                        | 19.6 (5.9)       | 28 (11.2)        | 25.3 (12.5)      | 19 (4.6)         | 0.352 |
| Leucine/Alanine Ratio, mean<br>(SD)                  | 0.5 (0.2)        | 0.3 (0.1)        | 0.3 (0.2)        | 0.3 (0.1)        | 0.135 |
| Citrulline/Arginine Ratio,<br>mean (SD)              | 2.1 (0.9)        | 2.8 (2.2)        | 1.7 (1)          | 4.1 (3.4)        | 0.331 |
| C14:2-Carnitine, mean (SD)                           | 0 (0)            | 0 (0)            | 0 (0)            | 0 (0)            | 0.1   |
| C4-Carnitine, median (IQR)                           | 0.3<br>(0.2,0.3) | 0.2<br>(0.1,0.3) | 0.2<br>(0.2,0.3) | 0.2<br>(0.2,0.2) | 0.691 |

|                                  |                 |                 |                 |                 |       |
|----------------------------------|-----------------|-----------------|-----------------|-----------------|-------|
| C8:1-Carnitine, mean (SD)        | 0.1 (0)         | 0.1 (0)         | 0.1 (0)         | 0.1 (0)         | 0.216 |
| Phenylalanine/Tyrosine           | 0.6             |                 | 0.7             | 0.6             |       |
| Ratio, median (IQR)              | (0.6,0.7)       | 0.9 (0.9,1)     | (0.7,0.8)       | (0.6,0.7)       | 0.036 |
| C2-Carnitine, mean (SD)          | 23.7 (9.8)      | 26.6 (11.4)     | 20 (4.5)        | 23.6 (7.2)      | 0.701 |
| Biotinidase, mean (SD)           | 43.4<br>(10.3)  | 41.7 (5.6)      | 51.4 (13.8)     | 42.7 (7.5)      | 0.417 |
| C5DC-Carnitine, mean (SD)        | 0.2 (0.1)       | 0.1 (0)         | 0.2 (0.1)       | 0.2 (0.1)       | 0.104 |
| C18OH-Carnitine, median (IQR)    | 0 (0,0)         | 0 (0,0)         | 0 (0,0)         | 0 (0,0)         | 0.086 |
| C3-Carnitine, mean (SD)          | 1.6 (0.4)       | 2.1 (0.9)       | 1.6 (0.5)       | 2.2 (0.6)       | 0.318 |
| C18-Carnitine, mean (SD)         | 0.8 (0.2)       | 0.8 (0.2)       | 0.7 (0.1)       | 0.8 (0.2)       | 0.454 |
| C14:1-Carnitine /                |                 |                 |                 |                 |       |
| C12:1-Carnitine Ratio, mean (SD) | 1.3 (0.1)       | 1.7 (0.9)       | 1.2 (0.4)       | 1.6 (0.4)       | 0.51  |
| C10-Carnitine, mean (SD)         | 0.1 (0)         | 0 (0)           | 0.1 (0)         | 0.1 (0)         | 0.005 |
| C5:1-Carnitine, median (IQR)     | 0 (0,0)         | 0 (0,0)         | 0 (0,0)         | 0 (0,0)         | 0.51  |
| 5-Oxoproline, mean (SD)          | 21.8 (5)        | 32 (7.4)        | 26.8 (6.6)      | 25.2 (8.2)      | 0.221 |
| C10:1-Carnitine, mean (SD)       | 0.1 (0)         | 0 (0)           | 0.1 (0)         | 0 (0)           | 0.238 |
| C5-Carnitine, mean (SD)          | 0.1 (0)         | 0.1 (0.1)       | 0.1 (0)         | 0.1 (0)         | 0.978 |
| Phenylalanine, mean (SD)         | 63.9 (8.2)      | 69.8 (33.3)     | 55.4 (19.7)     | 66.6 (15.8)     | 0.719 |
| Proline, mean (SD)               | 203.4<br>(38.2) | 159.8<br>(73.4) | 180.8<br>(43.6) | 179.2<br>(33.7) | 0.593 |

|                               |             |             |             |             |       |
|-------------------------------|-------------|-------------|-------------|-------------|-------|
| C16OH-Carnitine, mean (SD)    | 0 (0)       | 0 (0)       | 0 (0)       | 0 (0)       | 0.032 |
|                               | 103.6       |             |             | 102.7       |       |
| Tyrosine, mean (SD)           | (17.7)      | 72.6 (35.5) | 68.7 (30.1) | (32.7)      | 0.15  |
|                               | 98.6        | 103.8       |             |             |       |
| Ornithine, mean (SD)          | (44.5)      | (92.5)      | 102 (53.1)  | 79.8 (28)   | 0.882 |
| FC / (C16-Carnitine +         |             |             |             |             |       |
| C18:1-Carnitine) Ratio,       | 4.3 (3.9,5) | 8.1 (7.3,9) | 6.7 (5,7.1) | 4.5 (3.7,5) | 0.037 |
| median (IQR)                  |             |             |             |             |       |
| C16-Carnitine, mean (SD)      | 3.4 (1)     | 2.5 (0.9)   | 2.3 (0.3)   | 3.1 (0.8)   | 0.166 |
| C14OH-Carnitine, mean (SD)    | 0 (0)       | 0 (0)       | 0 (0)       | 0 (0)       | 0.012 |
| C3DC-Carnitine, mean (SD)     | 0.1 (0)     | 0.1 (0)     | 0.1 (0)     | 0.1 (0)     | 0.02  |
| C14:1-Carnitine, mean (SD)    | 0.2 (0.1)   | 0 (0)       | 0.1 (0)     | 0.1 (0)     | 0.004 |
| C5-Carnitine /C3-Carnitine    |             |             |             |             |       |
| Ratio, mean (SD)              | 0.1 (0)     | 0.1 (0)     | 0.1 (0)     | 0.1 (0)     | 0.279 |
| C8-Carnitine /C10-Carnitine   |             |             |             |             |       |
| Ratio, mean (SD)              | 0.7 (0.1)   | 1 (0.5)     | 1 (0.3)     | 0.8 (0.1)   | 0.472 |
| Citrulline, mean (SD)         | 16.6 (3.6)  | 11.8 (3.9)  | 14 (6)      | 17 (3.2)    | 0.242 |
| Valine / Phenylalanine Ratio, |             |             |             |             |       |
| mean (SD)                     | 1.7 (0.3)   | 1.5 (0.4)   | 1.9 (0.4)   | 1.4 (0.3)   | 0.147 |

535 Values are mean ± SD or numbers (percentages). SD: Standard deviation; IQR:

536 Interquartile Range. CHD: Congenital heart disease. TOF: Tetralogy of Fallot. IAS:

537 Inherited arrhythmias syndromes. CMP: Cardiomyopathies.

538

539 **Table 2.** Discernibility ability to CHD subtypes by global hydrophilic and  
540 hydrophobic metabolomics with orthogonal partial least squares discriminant  
541 analysis (OPLS-DA) .

|                 | Hydrophilic |         | Hydrophobic |         |
|-----------------|-------------|---------|-------------|---------|
|                 | AUC         | P-value | AUC         | P-value |
| HC vs Other(s)  | 1.00        | 0.001   | 1.00        | 0.001   |
| CMP vs Other(s) | 0.881       | 0.008   | 0.607       | 0.458   |
| IAS vs Other(s) | 0.533       | 0.827   | 0.987       | 0.001   |
| TOF vs Other(s) | 0.969       | 0.005   | 0.906       | 0.014   |

542 HC: Health Control. TOF: Tetralogy of Fallot. IAS: Inherited arrhythmias syndromes. CMP:  
543 Cardiomyopathies.

## 544 **Figures**

545 **Figure 1.** Study workflow diagram to apply metabolomic analytics to the  
546 neonate DBS samples and to discover CHD biomarkers. Abbreviations: CHD-  
547 Congenital heart disease, TOF- Tetralogy of Fallot, IAS- Inherited arrhythmias  
548 syndromes, CMP- Cardiomyopathies.

549 **Figure 2.** Statistical distribution of DBS Samples storage times in California  
550 Department of Public Health (CDPH) Lab.

551 **Figure 3.** Impact of the time storage of metabolites. A) scatter plots showing  
552 the positive correlations of metabolic profiling between this study (X-axis) and  
553 the CDPH DBS records (Y-axis). B) Statistical distribution of the correlation  
554 coefficient.

555 **Figure 4.** Orthogonal partial least squares discriminant analysis (OPLS-DA)  
556 using the global hydrophilic and hydrophobic metabolic profiling results of  
557 health control (HC), CHD-Tetralogy of Fallot (TOF), CHD-inherited arrhythmia  
558 syndromes (IAS) and CHD-cardiomyopathies (CMP). A) clustering results of  
559 hydrophilic metabolic profiling B) clustering results of hydrophobic metabolic  
560 profiling.

561 **Figure 5.** Significant Metabolic pathways altered in different CHD subtypes.  
562 Pathway enrichment analysis on the A) global hydrophilic and B) hydrophobic  
563 metabolic profiling. All significant changed components (P value <0.05,  
564 Student's t-test) in CHD-Tetralogy of Fallot (TOF), CHD-inherited arrhythmia  
565 syndromes (IAS) and CHD-cardiomyopathies (CMP) are mapping to KEGG  
566 metabolic pathways and Lipid Map database, respectively. \*: P value <0.05, \*\*:  
567 P value <0.01, \*\*\*: P value <0.001.

568 **Figure 6.** The application of targeted metabolomics to discover CHD diagnosis  
569 and subtyping biomarker metabolites using DBS samples. A) Volcano plots for  
570 screening significant changed metabolites associated with CHD, the  
571 metabolites with P value < 0.05 and fold change >1.5 are marked as red dots  
572 and the metabolites with P value < 0.05 and fold change < 0.67 are marked as  
573 blue dots. B) violin plots for three biomarker metabolites for CHD diagnosis. \*:

574 Student's P value <0.05, \*\*: P value <0.01, \*\*\*: P value <0.001. C) the  
575 smoothed receiver operating characteristic curve (AUC ROC) of logistic model  
576 based on three biomarkers. 95% confidence intervals are shown in grey lines.  
577 D) the importance score of the 12 metabolites associated with CHD subtyping  
578 which have an 80% cumulative importance in total. E) PLS-DA cluster results  
579 using 12 metabolites for CHD subtyping.

580 **Figure 7.** CHD Subtyping modeling with targeted metabolomic profiling  
581 analysis of newborn DBS samples. A) Confusion matrix. B) AUC curves to  
582 demonstrate the performance to diagnose CHD subtypes.

### 583 **Acknowledgements**

584 The biospecimens and/or data (Request ID: 1893) used in this study were  
585 obtained from the California Biobank Program (CBP) in accordance with  
586 Section 6555(a), 17 CCR. The California Department of Public Health is not  
587 responsible for the results or conclusions drawn by the authors of this  
588 publication.

### 589 **Author contributions**

590 Experimental design: S.R. Ceresnac, X.B.Ling

591 Mass spectrometric assay development: X.B.Ling, Y. Zhang, K.J. Su, J.

592 Schilling, R.Y. Luo

593 Sample procurement and data entry: S.R. Ceresnac, X.B.Ling, Y. Zhang

594 Data analysis: Q. Tang, B. Jin, C.J. Chou, Z. Han, L. Tian,



595 Clinical Interpretation: S.R. Ceresnac, B.J. Floyd, K.G. Sylvester, H. Chubb,  
596 H.J. Cohen, Doff. McElhinney  
597 Manuscript preparation: S.R. Ceresnac, X.B.Ling, Y. Zhang, J.C. Whitin, K.G.  
598 Sylvester, H. Chubb, , H.J. Cohen, D.B. McElhinney

### 599 **Competing interests**

600 K.J. Su, Q. Tang, J. Schilling, B. Jin are staff members of mProbe Inc. The rest  
601 of the authors declare no conflict of interest. The funders had no role in the  
602 design of the study; in the collection, analyses, or interpretation of data; in the  
603 writing of the manuscript; or in the decision to publish the results.

### 604 **References**

- 605 1. Hoffman JI, Kaplan S. The incidence of congenital heart disease. *J Am Coll*  
606 *Cardiol.* 2002;39:1890-1900. doi: 10.1016/s0735-1097(02)01886-7
- 607 2. van der Linde D, Konings EE, Slager MA, Witsenburg M, Helbing WA,  
608 Takkenberg JJ, Roos-Hesselink JW. Birth prevalence of congenital heart disease  
609 worldwide: a systematic review and meta-analysis. *J Am Coll Cardiol.*  
610 2011;58:2241-2247. doi: 10.1016/j.jacc.2011.08.025
- 611 3. Baird PA, Sadovnick AD, Yee IM. Maternal age and birth defects: a population  
612 study. *Lancet.* 1991;337:527-530. doi: 10.1016/0140-6736(91)91306-f
- 613 4. Wang Z, Li L, Lei XY, Xue J, Mi HY. [Effect of advanced maternal age on birth  
614 defects and postnatal complications of neonates]. *Zhongguo Dang Dai Er Ke Za*  
615 *Zhi.* 2016;18:1084-1089.
- 616 5. Khairy P, Ionescu-Ittu R, Mackie AS, Abrahamowicz M, Pilote L, Marelli AJ.  
617 Changing mortality in congenital heart disease. *J Am Coll Cardiol.*  
618 2010;56:1149-1157. doi: 10.1016/j.jacc.2010.03.085
- 619 6. Thangaratnam S, Brown K, Zamora J, Khan KS, Ewer AK. Pulse oximetry  
620 screening for critical congenital heart defects in asymptomatic newborn babies: a  
621 systematic review and meta-analysis. *Lancet.* 2012;379:2459-2464. doi:  
622 10.1016/S0140-6736(12)60107-X
- 623 7. Diller CL, Kelleman MS, Kupke KG, Quarry SC, Kochilas LK, Oster ME. A  
624 Modified Algorithm for Critical Congenital Heart Disease Screening Using Pulse  
625 Oximetry. *Pediatrics.* 2018;141. doi: 10.1542/peds.2017-4065

- 626 8. Mahle WT, Newburger JW, Matherne GP, Smith FC, Hoke TR, Koppel R,  
627 Gidding SS, Beekman RH, 3rd, Grosse SD, American Heart Association  
628 Congenital Heart Defects Committee of the Council on Cardiovascular Disease in  
629 the Young CoCN, et al. Role of pulse oximetry in examining newborns for  
630 congenital heart disease: a scientific statement from the American Heart  
631 Association and American Academy of Pediatrics. *Circulation*. 2009;120:447-458.  
632 doi: 10.1161/CIRCULATIONAHA.109.192576
- 633 9. Dalal A, Czosek RJ, Kovach J, von Alvensleben JC, Valdes S, Etheridge SP,  
634 Ackerman MJ, Auld D, Huckaby J, McCracken C, et al. Clinical Presentation of  
635 Pediatric Patients at Risk for Sudden Cardiac Arrest. *J Pediatr*. 2016;177:191-196.  
636 doi: 10.1016/j.jpeds.2016.06.088
- 637 10. Kruska M, El-Battrawy I, Behnes M, Borggrefe M, Akin I. Biomarkers in  
638 Cardiomyopathies and Prediction of Sudden Cardiac Death. *Curr Pharm  
639 Biotechnol*. 2017;18:472-481. doi: 10.2174/1389201018666170623125842
- 640 11. Chatterjee D, Fatah M, Akdis D, Spears DA, Koopmann TT, Mittal K, Rafiq MA,  
641 Cattanach BM, Zhao Q, Healey JS, et al. An autoantibody identifies  
642 arrhythmogenic right ventricular cardiomyopathy and participates in its  
643 pathogenesis. *Eur Heart J*. 2018;39:3932-3944. doi: 10.1093/eurheartj/ehy567
- 644 12. Coats CJ, Heywood WE, Mills K, Elliott PM. Current applications of biomarkers  
645 in cardiomyopathies. *Expert Rev Cardiovasc Ther*. 2015;13:825-837. doi:  
646 10.1586/14779072.2015.1053873
- 647 13. Fastner C, Behnes M, Sartorius B, Wenke A, Lang S, Yucel G, Sattler K, Rusnak  
648 J, Saleh A, Barth C, et al. Interventional Left Atrial Appendage Closure Affects  
649 the Metabolism of Acylcarnitines. *Int J Mol Sci*. 2018;19. doi:  
650 10.3390/ijms19020500
- 651 14. Altit G, Bhombal S, Tacy TA, Chock VY. End-Organ Saturation Differences in  
652 Early Neonatal Transition for Left- versus Right-Sided Congenital Heart Disease.  
653 *Neonatology*. 2018;114:53-61. doi: 10.1159/000487472
- 654 15. Reddy S, Zhao M, Hu DQ, Fajardo G, Katznelson E, Punnett R, Spin JM, Chan FP,  
655 Bernstein D. Physiologic and molecular characterization of a murine model of  
656 right ventricular volume overload. *Am J Physiol Heart Circ Physiol*.  
657 2013;304:H1314-1327. doi: 10.1152/ajpheart.00776.2012
- 658 16. Bove T, Vandekerckhove K, Bouchez S, Wouters P, Somers P, Van Nooten G.  
659 Role of myocardial hypertrophy on acute and chronic right ventricular  
660 performance in relation to chronic volume overload in a porcine model: relevance  
661 for the surgical management of tetralogy of Fallot. *J Thorac Cardiovasc Surg*.  
662 2014;147:1956-1965. doi: 10.1016/j.jtcvs.2013.10.026
- 663 17. Del Duca D, Wong G, Trieu P, Rodaros D, Kouremenos A, Tadevosyan A,  
664 Vaniotis G, Villeneuve LR, Tchervenkov CI, Nattel S, et al. Association of  
665 neonatal hypoxia with lasting changes in left ventricular gene expression: an  
666 animal model. *J Thorac Cardiovasc Surg*. 2009;138:538-546, 546 e531. doi:  
667 10.1016/j.jtcvs.2009.04.042

- 668 18. Liao P, Soong TW. CaV1.2 channelopathies: from arrhythmias to autism, bipolar  
669 disorder, and immunodeficiency. *Pflugers Arch.* 2010;460:353-359. doi:  
670 10.1007/s00424-009-0753-0
- 671 19. la Marca G, Carling RS, Moat SJ, Yahyaoui R, Ranieri E, Bonham JR, Schielen P.  
672 Current State and Innovations in Newborn Screening: Continuing to Do Good and  
673 Avoid Harm. *Int J Neonatal Screen.* 2023;9. doi: 10.3390/ijns9010015
- 674 20. Sinclair TJ, Ye C, Chen Y, Zhang D, Li T, Ling XB, Cohen HJ, Shaw GM,  
675 Stevenson DK, Chace D, et al. Progressive Metabolic Dysfunction and Nutritional  
676 Variability Precedes Necrotizing Enterocolitis. *Nutrients.* 2020;12. doi:  
677 10.3390/nu12051275
- 678 21. Zhu L, Huang Q, Li X, Jin B, Ding Y, Chou CJ, Su KJ, Zhang Y, Chen X, Hwa  
679 KY, et al. Serological Phenotyping Analysis Uncovers a Unique Metabolomic  
680 Pattern Associated With Early Onset of Type 2 Diabetes Mellitus. *Front Mol*  
681 *Biosci.* 2022;9:841209. doi: 10.3389/fmolb.2022.841209
- 682 22. Kanehisa M, Furumichi M, Sato Y, Ishiguro-Watanabe M, Tanabe M. KEGG:  
683 integrating viruses and cellular organisms. *Nucleic Acids Res.*  
684 2021;49:D545-D551. doi: 10.1093/nar/gkaa970
- 685 23. Fahy E, Subramaniam S, Murphy RC, Nishijima M, Raetz CR, Shimizu T, Spener  
686 F, van Meer G, Wakelam MJ, Dennis EA. Update of the LIPID MAPS  
687 comprehensive classification system for lipids. *J Lipid Res.* 2009;50 Suppl:S9-14.  
688 doi: 10.1194/jlr.R800095-JLR200
- 689 24. Bradshaw CJA, Herrando-Perez S. Logistic-growth models measuring density  
690 feedback are sensitive to population declines, but not fluctuating carrying capacity.  
691 *Ecol Evol.* 2023;13:e10010. doi: 10.1002/ece3.10010
- 692 25. Peng Y, Zhao S, Zeng Z, Hu X, Yin Z. LGBMDF: A cascade forest framework  
693 with LightGBM for predicting drug-target interactions. *Front Microbiol.*  
694 2022;13:1092467. doi: 10.3389/fmicb.2022.1092467
- 695 26. Ke G, Meng Q, Finley T, Wang T, Chen W, Ma W, Ye Q, Liu T-Y. LightGBM: a  
696 highly efficient gradient boosting decision tree. In: *Proceedings of the 31st*  
697 *International Conference on Neural Information Processing Systems.* Long Beach,  
698 California, USA: Curran Associates Inc.; 2017:3149–3157.
- 699 27. Hakuno D, Hamba Y, Toya T, Adachi T. Plasma amino acid profiling identifies  
700 specific amino acid associations with cardiovascular function in patients with  
701 systolic heart failure. *PLoS One.* 2015;10:e0117325. doi:  
702 10.1371/journal.pone.0117325
- 703 28. Fukushima A, Zhang L, Huqi A, Lam VH, Rawat S, Altamimi T, Wagg CS,  
704 Dhaliwal KK, Hornberger LK, Kantor PF, et al. Acetylation contributes to  
705 hypertrophy-caused maturational delay of cardiac energy metabolism. *JCI Insight.*  
706 2018;3. doi: 10.1172/jci.insight.99239
- 707 29. Wang B, Wu L, Chen J, Dong L, Chen C, Wen Z, Hu J, Fleming I, Wang DW.  
708 Metabolism pathways of arachidonic acids: mechanisms and potential therapeutic  
709 targets. *Signal Transduct Target Ther.* 2021;6:94. doi:  
710 10.1038/s41392-020-00443-w

- 711 30. Yang LG, Song ZX, Yin H, Wang YY, Shu GF, Lu HX, Wang SK, Sun GJ. Low  
712 n-6/n-3 PUFA Ratio Improves Lipid Metabolism, Inflammation, Oxidative Stress  
713 and Endothelial Function in Rats Using Plant Oils as n-3 Fatty Acid Source.  
714 *Lipids*. 2016;51:49-59. doi: 10.1007/s11745-015-4091-z
- 715 31. Kanoh M, Inai K, Shinohara T, Tomimatsu H, Nakanishi T. Clinical implications  
716 of eicosapentaenoic acid/arachidonic acid ratio (EPA/AA) in adult patients with  
717 congenital heart disease. *Heart Vessels*. 2017;32:1513-1522. doi:  
718 10.1007/s00380-017-1015-2
- 719 32. Tian W, Jiang X, Tamosiuniene R, Sung YK, Qian J, Dhillon G, Gera L, Farkas L,  
720 Rabinovitch M, Zamanian RT, et al. Blocking macrophage leukotriene b4 prevents  
721 endothelial injury and reverses pulmonary hypertension. *Sci Transl Med*.  
722 2013;5:200ra117. doi: 10.1126/scitranslmed.3006674
- 723 33. Vrigkou E, Tsantes AE, Kopterides P, Orfanos SE, Armaganidis A, Maratou E,  
724 Rapti E, Pappas A, Tsantes AG, Tsangaris I. Coagulation Profiles of Pulmonary  
725 Arterial Hypertension Patients, Assessed by Non-Conventional Hemostatic Tests  
726 and Markers of Platelet Activation and Endothelial Dysfunction. *Diagnostics*  
727 (*Basel*). 2020;10. doi: 10.3390/diagnostics10100758
- 728 34. Gu H, Fang YJ, Liu DD, Chen P, Mei YA. cAMP/PKA Pathways and S56  
729 Phosphorylation Are Involved in AA/PGE2-Induced Increases in rNaV1.4  
730 Current. *PLoS One*. 2015;10:e0140715. doi: 10.1371/journal.pone.0140715
- 731 35. Lai J, Chen C. The Role of Epoxyeicosatrienoic Acids in Cardiac Remodeling.  
732 *Front Physiol*. 2021;12:642470. doi: 10.3389/fphys.2021.642470
- 733 36. Evangelista EA, Aliwarga T, Sotoodehnia N, Jensen PN, McKnight B, Lemaitre  
734 RN, Totah RA, Gharib SA. CYP2J2 Modulates Diverse Transcriptional Programs  
735 in Adult Human Cardiomyocytes. *Sci Rep*. 2020;10:5329. doi:  
736 10.1038/s41598-020-62174-w
- 737 37. Li N, Liu JY, Qiu H, Harris TR, Sirish P, Hammock BD, Chiamvimonvat N. Use  
738 of metabolomic profiling in the study of arachidonic acid metabolism in  
739 cardiovascular disease. *Congest Heart Fail*. 2011;17:42-46. doi:  
740 10.1111/j.1751-7133.2010.00209.x
- 741 38. Levick SP, Loch DC, Taylor SM, Janicki JS. Arachidonic acid metabolism as a  
742 potential mediator of cardiac fibrosis associated with inflammation. *J Immunol*.  
743 2007;178:641-646. doi: 10.4049/jimmunol.178.2.641
- 744 39. Aslibekyan S, Jensen MK, Campos H, Linkletter CD, Loucks EB, Ordovas JM,  
745 Deka R, Rimm EB, Baylin A. Fatty Acid desaturase gene variants, cardiovascular  
746 risk factors, and myocardial infarction in the costa rica study. *Front Genet*.  
747 2012;3:72. doi: 10.3389/fgene.2012.00072
- 748 40. Pahnke A, Conant G, Huyer LD, Zhao Y, Feric N, Radisic M. The role of Wnt  
749 regulation in heart development, cardiac repair and disease: A tissue engineering  
750 perspective. *Biochem Biophys Res Commun*. 2016;473:698-703. doi:  
751 10.1016/j.bbrc.2015.11.060
- 752 41. Wang J, Liang Y, Jian L, Zhang J, Liang S, Xiao S, Liu B, Wang H. Linoelaidic  
753 acid enhances adipogenic differentiation in adipose tissue-derived stromal cells  
754 through suppression of Wnt/beta-catenin signaling pathway in vitro.

- 755        *Prostaglandins Leukot Essent Fatty Acids*. 2016;110:1-7. doi:  
756        10.1016/j.plefa.2016.04.004
- 757    42. Mohamed IA, El-Badri N, Zaher A. Wnt Signaling: The double-edged sword  
758        diminishing the potential of stem cell therapy in congenital heart disease. *Life Sci*.  
759        2019;239:116937. doi: 10.1016/j.lfs.2019.116937
- 760    43. Dekker Nitert M, Vaswani K, Hum M, Chan HW, Wood-Bradley R, Henry S,  
761        Armitage JA, Mitchell MD, Rice GE. Maternal high-fat diet alters expression of  
762        pathways of growth, blood supply and arachidonic acid in rat placenta. *J Nutr Sci*.  
763        2013;2:e41. doi: 10.1017/jns.2013.36
- 764    44. Lee SH, Kim MH, Han HJ. Arachidonic acid potentiates hypoxia-induced VEGF  
765        expression in mouse embryonic stem cells: involvement of Notch, Wnt, and  
766        HIF-1alpha. *Am J Physiol Cell Physiol*. 2009;297:C207-216. doi:  
767        10.1152/ajpcell.00579.2008
- 768    45. Lambrechts D, Carmeliet P. Genetics in zebrafish, mice, and humans to dissect  
769        congenital heart disease: insights in the role of VEGF. *Curr Top Dev Biol*.  
770        2004;62:189-224. doi: 10.1016/S0070-2153(04)62007-2
- 771    46. Smedts HP, Rakhshandehroo M, Verkleij-Hagoort AC, de Vries JH, Ottenkamp J,  
772        Steegers EA, Steegers-Theunissen RP. Maternal intake of fat, riboflavin and  
773        nicotinamide and the risk of having offspring with congenital heart defects. *Eur J*  
774        *Nutr*. 2008;47:357-365. doi: 10.1007/s00394-008-0735-6
- 775    47. Smedts HP, van Uitert EM, Valkenburg O, Laven JS, Eijkemans MJ, Lindemans J,  
776        Steegers EA, Steegers-Theunissen RP. A derangement of the maternal lipid profile  
777        is associated with an elevated risk of congenital heart disease in the offspring. *Nutr*  
778        *Metab Cardiovasc Dis*. 2012;22:477-485. doi: 10.1016/j.numecd.2010.07.016
- 779    48. Burgoyne JR, Mongue-Din H, Eaton P, Shah AM. Redox signaling in cardiac  
780        physiology and pathology. *Circ Res*. 2012;111:1091-1106. doi:  
781        10.1161/CIRCRESAHA.111.255216
- 782    49. Manso PH, Carmona F, Dal-Pizzol F, Petronilho F, Cardoso F, Castro M, Carlotti  
783        AP. Oxidative stress markers are not associated with outcomes after pediatric heart  
784        surgery. *Paediatr Anaesth*. 2013;23:188-194. doi: 10.1111/pan.12040
- 785    50. Calza G, Lerzo F, Perfumo F, Borini I, Panizzon G, Moretti R, Grasso P, Virgone  
786        A, Zannini L. Clinical evaluation of oxidative stress and myocardial reperfusion  
787        injury in pediatric cardiac surgery. *J Cardiovasc Surg (Torino)*. 2002;43:441-447.
- 788    51. Nydegger A, Bines JE. Energy metabolism in infants with congenital heart  
789        disease. *Nutrition*. 2006;22:697-704. doi: 10.1016/j.nut.2006.03.010
- 790    52. Sun X, Sharma S, Fratz S, Kumar S, Rafikov R, Aggarwal S, Rafikova O, Lu Q,  
791        Burns T, Dasarathy S, et al. Disruption of endothelial cell mitochondrial  
792        bioenergetics in lambs with increased pulmonary blood flow. *Antioxid Redox*  
793        *Signal*. 2013;18:1739-1752. doi: 10.1089/ars.2012.4806
- 794    53. Black SM, Field-Ridley A, Sharma S, Kumar S, Keller RL, Kameny R, Maltepe E,  
795        Datar SA, Fineman JR. Altered Carnitine Homeostasis in Children With Increased  
796        Pulmonary Blood Flow Due to Ventricular Septal Defects. *Pediatr Crit Care Med*.  
797        2017;18:931-934. doi: 10.1097/PCC.0000000000001275

798 54. Bahado-Singh RO, Ertl R, Mandal R, Bjorndahl TC, Syngelaki A, Han B, Dong E,  
799 Liu PB, Alpay-Savasan Z, Wishart DS, et al. Metabolomic prediction of fetal  
800 congenital heart defect in the first trimester. *Am J Obstet Gynecol.* 2014;211:240  
801 e241-240 e214. doi: 10.1016/j.ajog.2014.03.056

802

**Figure 1.**

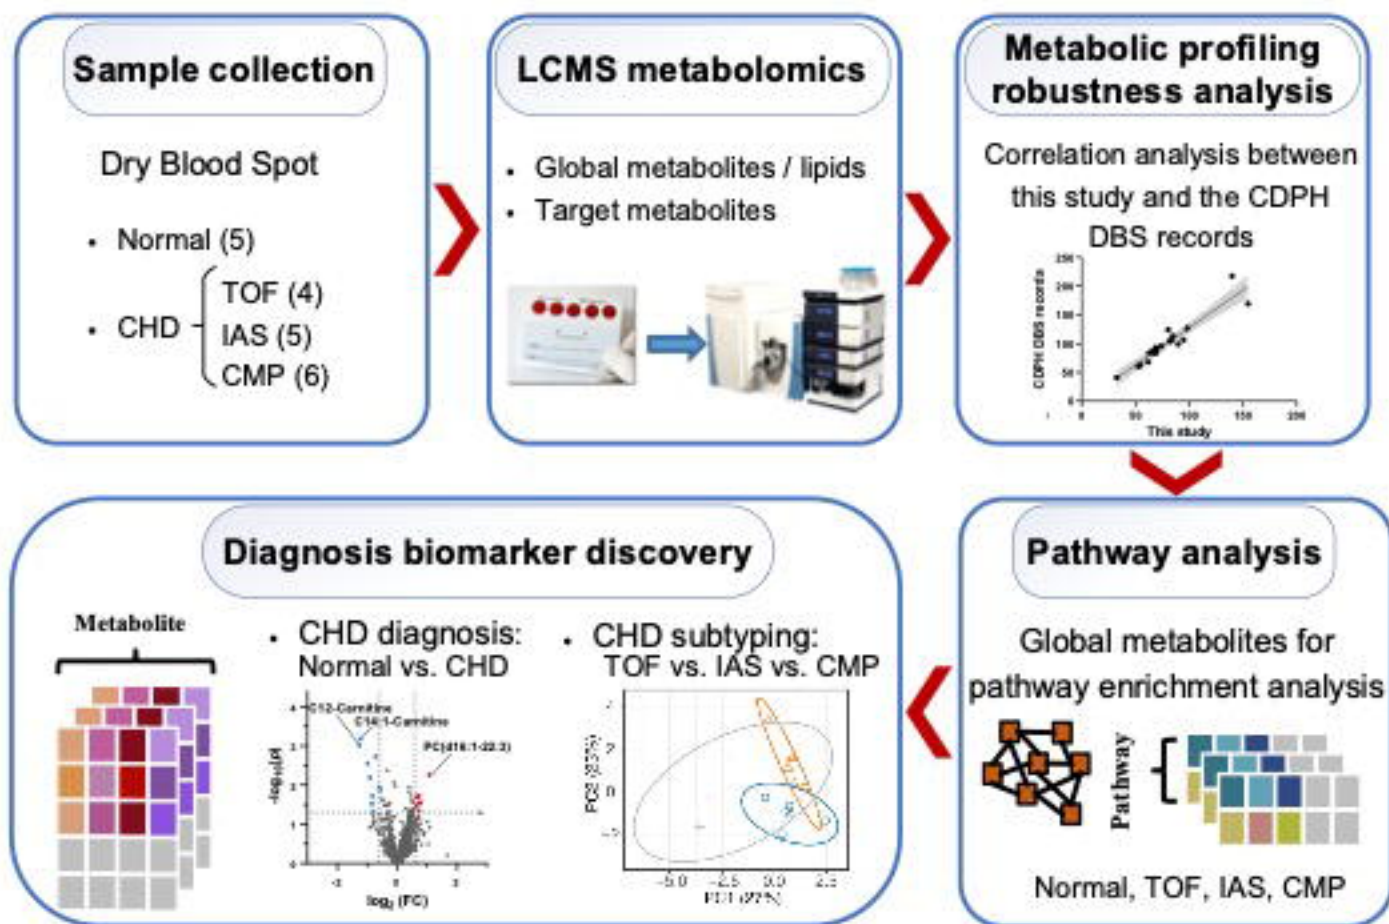

Figure 2.

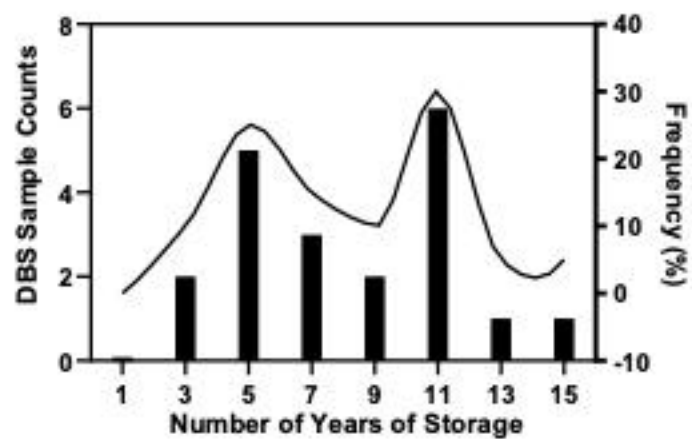



Figure 3.

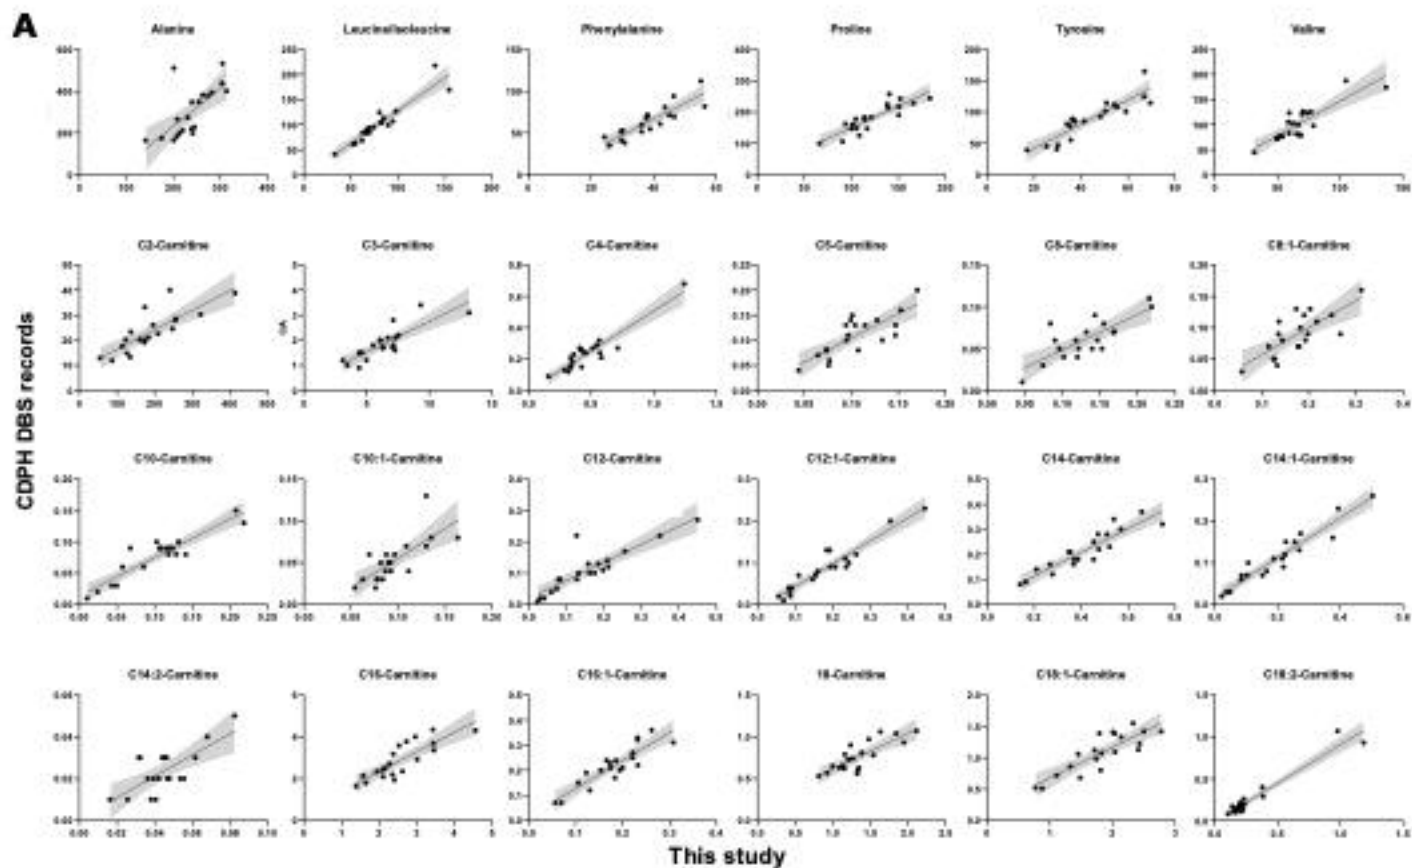

Figure 3.

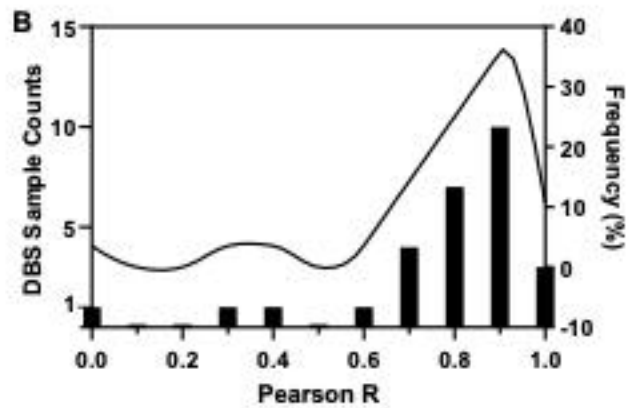

Figure 4.

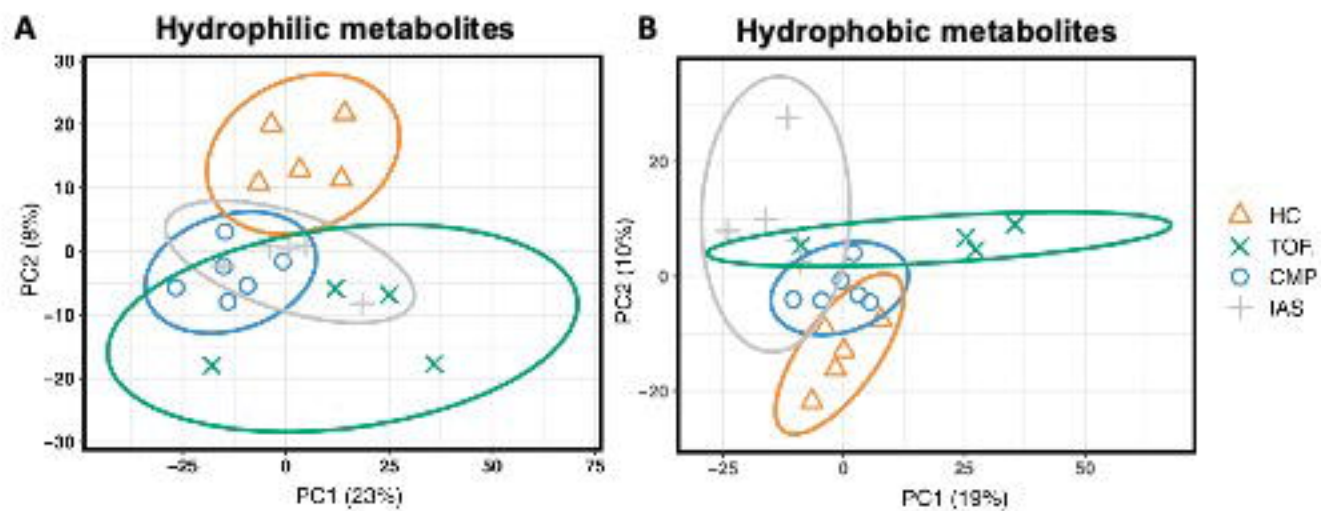

Figure 5.

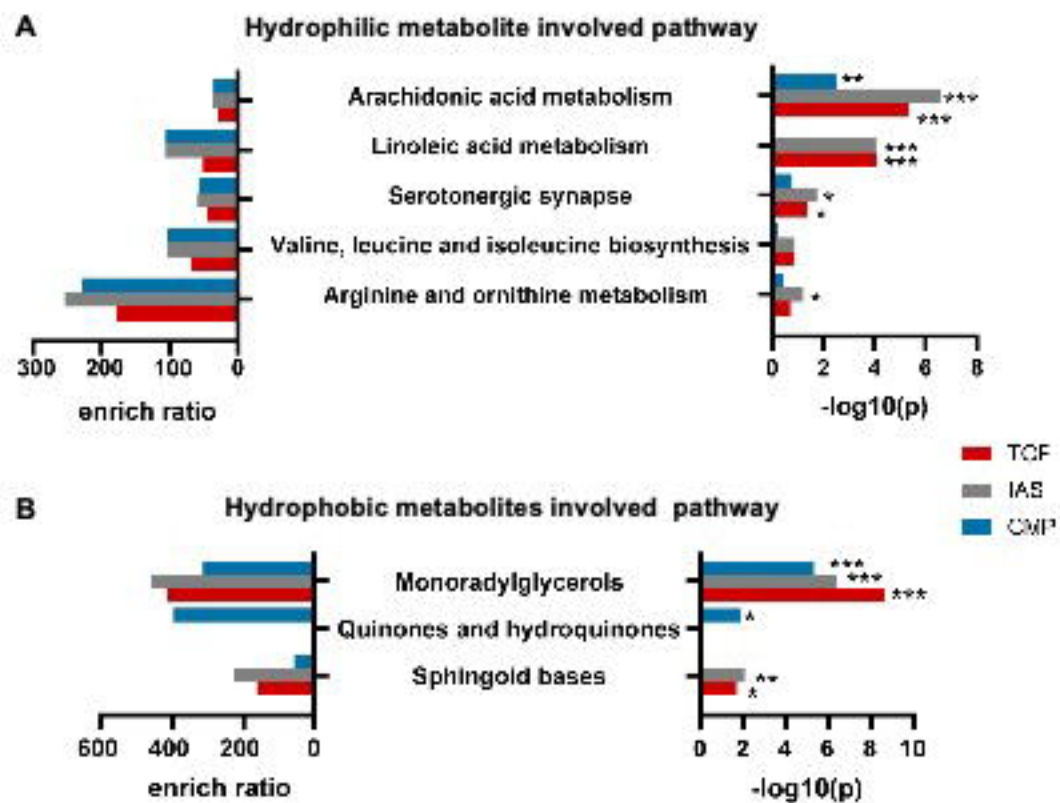

**Figure 6.**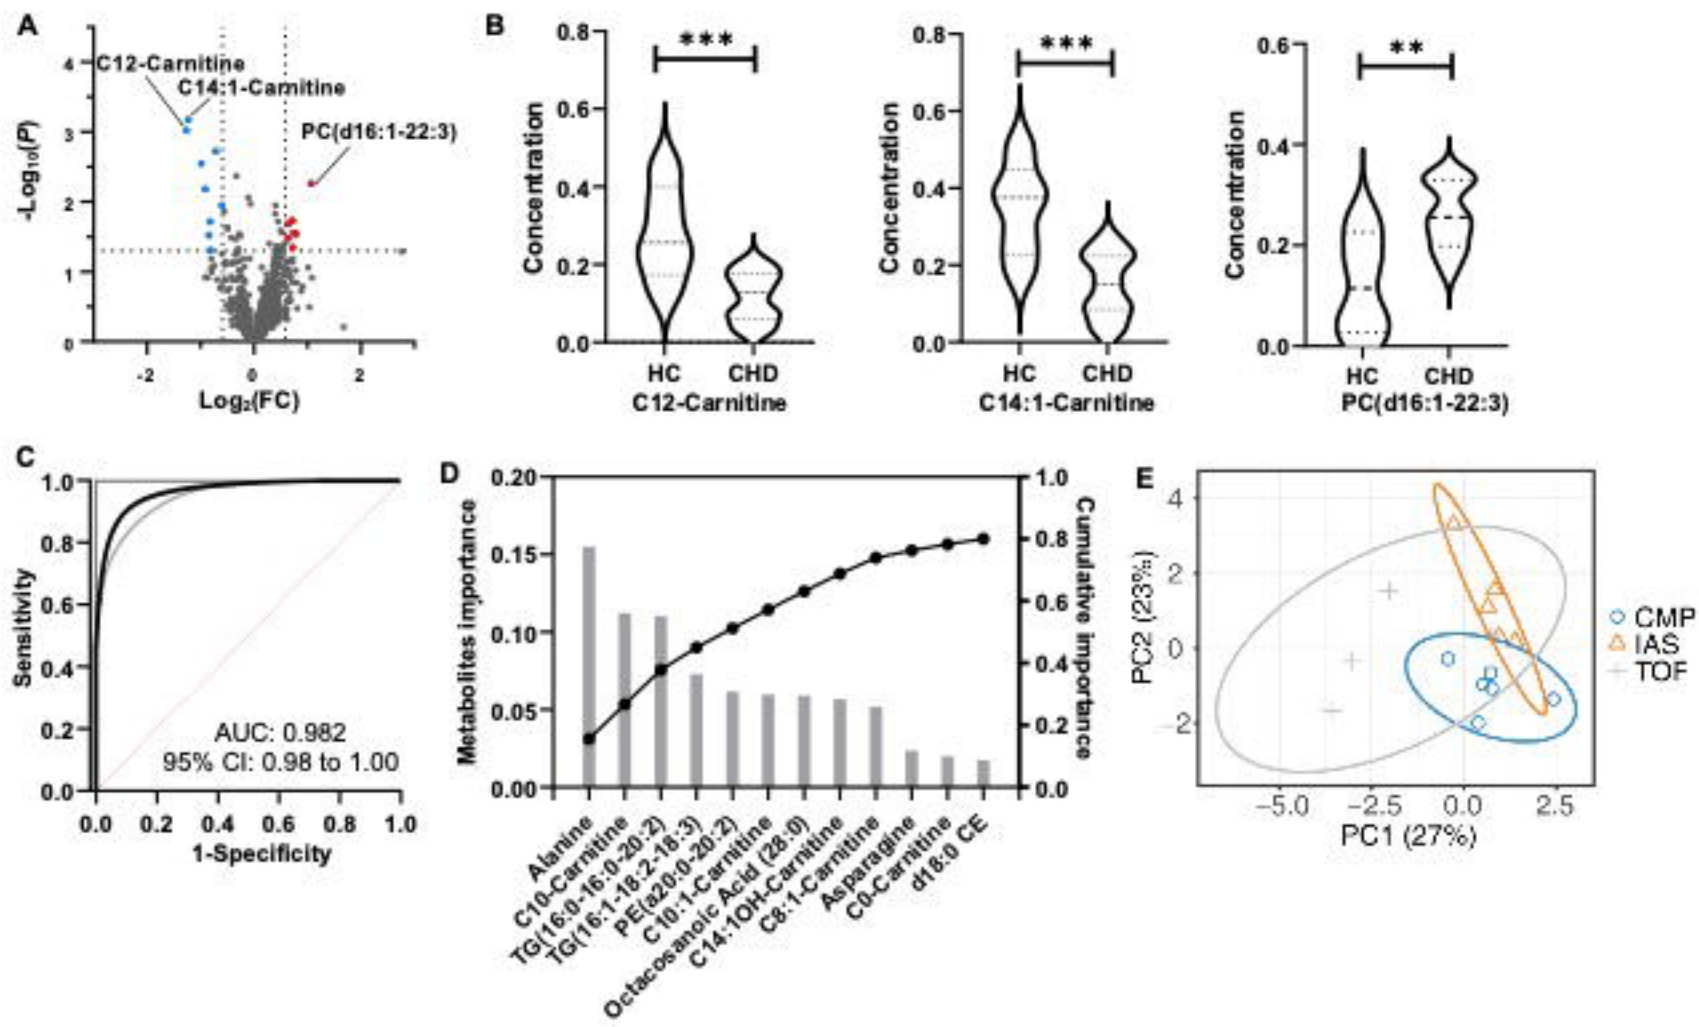

Source: https://www.medrxiv.org/content/10.1101/2023.08.01.23293520v1.full.pdf
